# Supplementary material for: A study to assess the effectiveness of a gender equality health education program on the knowledge of adolescents studying in selected schools at Vadodara, Gujarat,India
Source: Research Square preprint supplement (doi:10.21203/rs.3.rs-7777918/v1), 2025-11-25
Supplement: Supplementary file 1 [file ea14e19f524d252bc3e33e83.docx]

**Tool**

**SECTION – A: DEMOGRAPHIC VARIABLES**

**1.Age**

A) 13-14

B) 15-18

**2.Gender**

A) Male

B) Female

**3.Which region do you live in?**

A) Urban

C) Rural

**4.Who influences your views on gender roles the most?**

A) Parents

B) Teachers

C) Friends

D) Social Media

**5.What is your primary source of information regarding gender equality?**

A) Family

B) School

C) Social Media

D) Books

E) Peer Groups

**SECTION B:**

**KNOWLEDGE BASED QUESTIONS RELATED TO GENDER EQUALITY**

**1. Which of the following is a major impact of gender stereotypes in healthcare?**

A. Increased patient satisfaction

B. Reduced access to reproductive services

C. Encouraged use of contraceptives

D. Better emotional care

**2. How do masculine stereotypes affect mental health?**

A. Encourage emotional expression

B. Promote balance in lifestyle

C. Cause emotional suppression and help-seeking delay

D. Prevent substance abuse

**3. Gender-based violence violates which of the following most directly?**

A. Right to protest

B. Right to vote

C. Right to life and safety

D. Right to education

**4. Why is open communication important in mental health and gender education?**

A. It strengthens cultural taboos

B. It discourages emotional honesty

C. It helps challenge harmful gender norms

D. It promotes silence in tough topics

**5. What is a traditional stereotype placed on women?**

A. Emotionally expressive and nurturing

B. Encouraged to lead

C. Expected to suppress feelings

D. Excluded from caregiving

**6. Which of the following is part of reproductive health education?**

A. Anger control therapy

B. Nutrition labeling

C. Menstrual hygiene and contraceptives

D. Sleep cycle patterns

**7. Gender equality means:**

A. Equal rights and opportunities for all genders

B. Everyone becomes identical

C. Prioritizing women only

D. Social roles stay fixed

**8. Why is including boys in sexual health education important?**

A. To build shared responsibility and reduce bias

B. To scare them

C. To teach discipline

D. To promote silence

**9. Which of the following reflects economic gender-based violence?**

A. Scolding in public

B. Harassment at work

C. Public shaming

D. Denying financial resources to a partner

**10. Which mental health issue is commonly linked to unrealistic beauty standards in** girls?

A. Aggression

B. Eating disorders

C. Hyperactivity

D. Obsessive hoarding

**11. Which strategy supports gender empowerment and emotional wellness?**

A. Avoid mental health topics

B. Offer safe spaces and guidance for all genders

C. Separate boys and girls

D. Enforce silence on feelings

**12. Stigma about menstruation can lead to:**

A. Missed school and low confidence

B. Increased awareness

C. Public understanding

D. Equal participation

**13. What is a key purpose of consent education?**

A. To enforce discipline

B. To promote autonomy and safety in relationships

C. To avoid conversation

D. To increase medical cost

**14. A boy being discouraged from showing emotion is an example of:**

A. Emotional development

B. Moral education

C. Gender stereotype

D. Role training

**15. Which is a sign of psychological gender-based violence?**

A. Unequal salary

B. Constant belittling and threats

C. Physical harm

D. Disallowed voting

**16. Which action demonstrates gender equality in a classroom?**

A. Encouraging equal participation from all genders

B. Letting boys speak more

C. Teaching girls separately

D. Avoiding group work

**17. Which reproductive health issue is often untreated due to stigma?**

A. HIV

B. Puberty

C. Reproductive tract infections

D. Pregnanc

**18. Which of these methods is best to prevent gender-based violence long-term?**

A. Jail all offenders

B. Teach gender-specific skills only

C. Promote awareness and gender equality education

D. Keep silence about the topic

**19. One benefit of teaching mental health in gender equality sessions is:**

A. It discourages openness

B. It promotes early help-seeking and coping

C. It replaces reproductive education

D. It shifts focus from emotional issues

**20. Why is building self-confidence important in gender health education?**

A. It causes stress

B. It divides communities

C. It helps individuals stand up to stereotypes

D. It limits expression

| **QUESTION** | **ANSWER** |
| --- | --- |
| 1 | **B** |
| 2 | **C** |
| 3 | **C** |
| 4 | **C** |
| 5 | **A** |
| 6 | **C** |
| 7 | **A** |
| 8 | **A** |
| 9 | **D** |
| 10 | **B** |
| 11 | **B** |
| 12 | **A** |
| 13 | **B** |
| 14 | **C** |
| 15 | **B** |
| 16 | **A** |
| 17 | **C** |
| 18 | **C** |
| 19 | **B** |
| 20 | **C** |

**ANSWER KEY**

- **SECTION B:**
